# Supplementary material for: Uncovering Ecosystem Service Bundles through Social Preferences
Source: PubMed Central journal article supplement (PMC3377692; doi:10.1371/journal.pone.0038970), 2012-06-18
Supplement: pone.0038970.s001.pdf [file pone.0038970.s001.pdf]

**Figure S1.**  
**Characteristics of study sites in relation to climate data in Spain.**

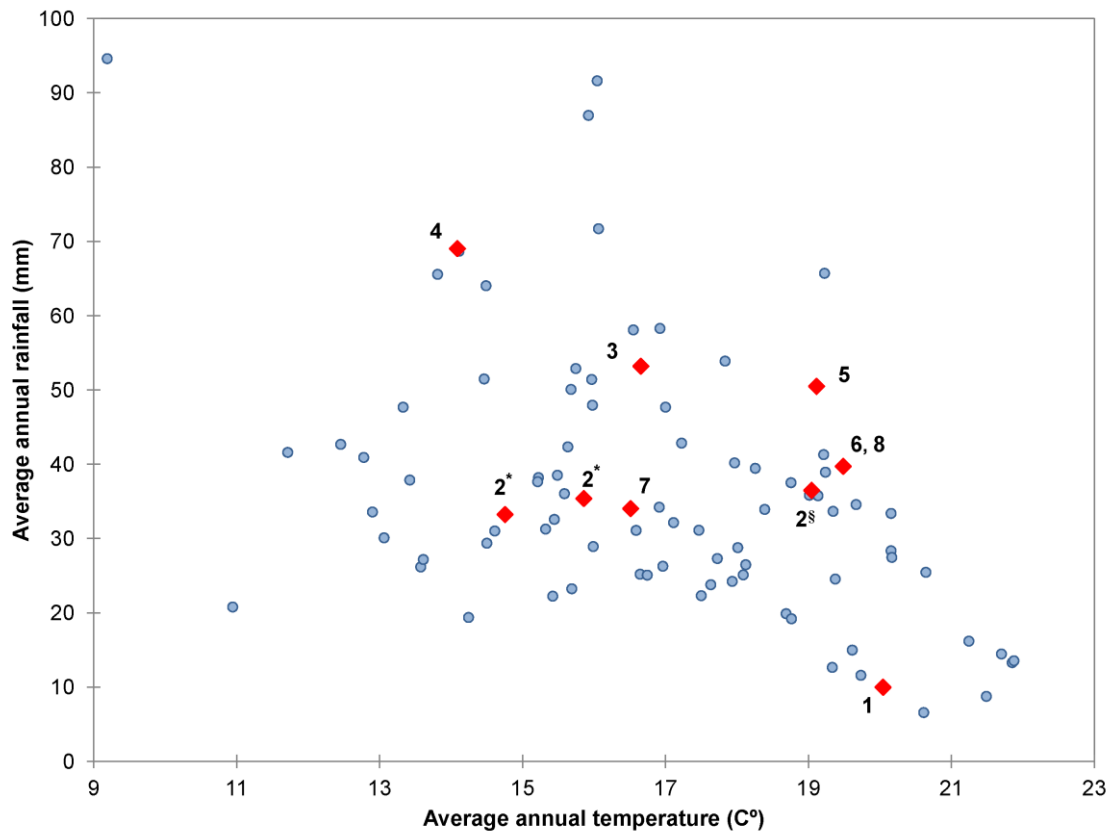

Blue circles are data of different climate stations in Spain.

Red diamonds are climatic data of study sites. Study sites are: 1 = The Adra River watershed, 2\* = The Conquense Drove Road (wintering areas), 2§ = The Conquense Drove Road (summering areas), 3 = The Bilbao Metropolitan Greenbelt, 4 = Costa da Morte, 5 = Doñana, 6 = The Guadamar Green Corridor, 7 = Sierra Nevada Mountains, and 8 = Sierra Norte de Sevilla.
