# Supplementary material for: Uncovering Ecosystem Service Bundles through Social Preferences
Source: PubMed Central journal article supplement (PMC3377692; doi:10.1371/journal.pone.0038970), 2012-06-18
Supplement: pone.0038970.s002.pdf [file pone.0038970.s002.pdf]

**Table S1. Main characteristics of sites included in this study and data sampling characteristics in each case study.**

| Site                                       | Characteristics of the case study |                                 |                                                        |                                                                                                                         | Data sampling characteristics |                                                          |                             |                                   |                    |
|--------------------------------------------|-----------------------------------|---------------------------------|--------------------------------------------------------|-------------------------------------------------------------------------------------------------------------------------|-------------------------------|----------------------------------------------------------|-----------------------------|-----------------------------------|--------------------|
|                                            | Total area<br>(km <sup>2</sup> )  | Altitude<br>range<br>(m.a.s.l.) | Main ecosystems*                                       | Type of Protected Area                                                                                                  | N° of<br>munic.               | Population<br>density<br>(inhabitants km <sup>-2</sup> ) | N° of<br>sampling<br>points | Date of<br>sampling               | Sample<br>size (N) |
| 1. The Adra<br>River watershed             | 744                               | 0–2611                          | Drylands<br>Forests<br>Mountains<br>Rivers and streams | The upper area was declared<br>National Park in 1999 and the<br>Albuferas of Adra were<br>declared Natural Park in 1989 | 14                            | 39                                                       | 20                          | May 2009 -<br>March 2010          | 200                |
| 2. The Conquense<br>Drove Road             | 15 297                            | 270 - 1930                      | Agroecosystems<br>Forests                              | There are 5 Natural Parks<br>along its extension                                                                        | 77                            | 26                                                       | 39                          | September<br>2009 -<br>March 2010 | 416                |
| 3. The Bilbao<br>Metropolitan<br>Greenbelt | 413                               | 0 – 998                         | Urban<br>Forests                                       | -                                                                                                                       | 29                            | 2164                                                     | 23                          | May 2009 -<br>July 2010           | 500                |
| 4. Costa da Morte                          | 1600                              | 0–580                           | Coastal<br>Agroecosystems                              | -                                                                                                                       | 17                            | 80                                                       | 7                           | September<br>2008                 | 212                |
| 5. Doñana                                  | 3298                              | 0–280                           | Wetlands<br>Coastal<br>Rivers and streams<br>Forests   | It was declared National Park<br>in 1969 and their surroundings<br>were declared Natural Park in<br>1980                | 16                            | 65                                                       | 17                          | October<br>2007 -March<br>2009    | 772                |
| 6. The Guadiamar<br>Green Corridor         | 2059                              | 0–580                           | Rivers and streams<br>Agroecosystems                   | The lower area was declared<br>National Park in 1969 and<br>Natural Park in 1980                                        | 15                            | 44                                                       | 10                          | October<br>2008 -<br>March 2009   | 215                |
| 7. Sierra Nevada<br>mountains              | 3655                              | 180–3479                        | Mountains<br>Forests<br>Drylands                       | It was declared National Park<br>in 1999 and in 1989 its<br>surroundings were designated<br>as a Natural Park           | 73                            | 94                                                       | 59                          | May 2009 -<br>July 2011           | 657                |
| 8. Sierra Norte de<br>Sevilla              | 1775                              | 35 - 945                        | Agroecosystems<br>Forests                              | It was declared Natural Park<br>in 1989                                                                                 | 10                            | 12                                                       | 6                           | July 2007                         | 407                |

\* Based on Millennium Ecosystem Assessment classification [1]

## References

1. Millennium Ecosystem Assessment (MA) (2005) *Ecosystems and Human Well-being: Synthesis*. Washington, DC.: Island Press. 137 p.
