# Supplementary material for: Uncovering Ecosystem Service Bundles through Social Preferences
Source: PubMed Central journal article supplement (PMC3377692; doi:10.1371/journal.pone.0038970), 2012-06-18
Supplement: pone.0038970.s003.pdf [file pone.0038970.s003.pdf]

**Table S2. Summary statistics of socio-economic characteristics of polled people for each case site.**

|                                      | <i>N</i>    | Level of studies (%) |                |                  |                   | Age (years) | Income (€)    | Gender (%)  |               | People living in a rural or urban municipality (%) |              | Member of an association* (%) | Visiting PAs <sup>†</sup> during the last year (%) |
|--------------------------------------|-------------|----------------------|----------------|------------------|-------------------|-------------|---------------|-------------|---------------|----------------------------------------------------|--------------|-------------------------------|----------------------------------------------------|
|                                      |             | <i>Non</i>           | <i>Primary</i> | <i>Secondary</i> | <i>University</i> |             |               | <i>Male</i> | <i>Female</i> | <i>Rural</i>                                       | <i>Urban</i> |                               |                                                    |
| 1. The Adra River watershed          | 200         | 2.0                  | 20.5           | 24.5             | 53.0              | 40.3        | 1416.0        | 59.0        | 41.0          | 41.5                                               | 58.5         | 16.5                          | 62.0                                               |
| 2. The Conquense Drove Road          | 416         | 3.6                  | 29.1           | 32.5             | 34.9              | 41.7        | 1235.6        | 58.9        | 41.1          | 63.0                                               | 37.0         | 44.5                          | 72.4                                               |
| 3. The Bilbao Metropolitan Greenbelt | 500         | 0.6                  | 22.8           | 36.6             | 40.0              | 41.9        | 1212.9        | 58.2        | 41.8          | 8.8                                                | 91.2         | 7.2                           | 60.8                                               |
| 4. Costa da Morte                    | 212         | 8.0                  | 26.4           | 42.9             | 22.6              | 36.7        | 1357.9        | 64.6        | 35.4          | 87.7                                               | 12.3         | 3.3                           | -                                                  |
| 5. Doñana                            | 772         | 10.0                 | 25.1           | 24.6             | 40.3              | 41.8        | 1557.2        | 58.4        | 41.5          | 30.8                                               | 69.2         | 16.5                          | 56.4                                               |
| 6. The Guadiamar Green Corridor      | 215         | 8.8                  | 37.2           | 32.6             | 21.4              | 42.3        | 1638.7        | 65.1        | 34.9          | 64.7                                               | 35.3         | 7.9                           | -                                                  |
| 7. Sierra Nevada mountains           | 657         | 2.1                  | 7.0            | 17.5             | 73.4              | 40.1        | 1278.4        | 63.5        | 36.5          | 97.6                                               | 2.4          | 8.8                           | 81.4                                               |
| 8. Sierra Norte de Sevilla           | 407         | 6.1                  | 22.6           | 48.2             | 22.4              | 37.7        | 1114.5        | 51.8        | 48.2          | 74.9                                               | 25.1         | 3.7                           | 38.1                                               |
| <i>All sample</i>                    | <i>3379</i> | <i>5.1</i>           | <i>22.0</i>    | <i>30.5</i>      | <i>42.3</i>       | <i>40.6</i> | <i>1310.4</i> | <i>59.5</i> | <i>40.5</i>   | <i>56.2</i>                                        | <i>43.8</i>  | <i>13.9</i>                   | <i>54.7</i>                                        |

\* Including environmental or social association

<sup>†</sup> PAs = protected areas
