# Supplementary material for: Uncovering Ecosystem Service Bundles through Social Preferences
Source: PubMed Central journal article supplement (PMC3377692; doi:10.1371/journal.pone.0038970), 2012-06-18
Supplement: pone.0038970.s004.pdf [file pone.0038970.s004.pdf]

**Table S3. Summary of the variables obtained from the questionnaire and used for the different analysis performed in the study.**

| <b>Code of variable</b>                                     | <b>Description</b>                                                             | <b>Type</b> | <b>Attributes</b> | <b>Analyses</b>                               |
|-------------------------------------------------------------|--------------------------------------------------------------------------------|-------------|-------------------|-----------------------------------------------|
| <b>Dependent variables</b>                                  |                                                                                |             |                   |                                               |
| <i>Service</i>                                              | If respondent recognized ecosystems' capacity to provide services              | Dummy       | 1: yes; 0: no     | Logit                                         |
| <i>Serv_cat</i>                                             | Relative importance held to each of the services categories                    | Continuous  |                   | Chi-squared<br>Kruskal-Wallis<br>Mann-Whitney |
| <b>Category of ecosystem services identified</b>            |                                                                                |             |                   |                                               |
| <i>Prov</i>                                                 | Category of ecosystem service                                                  | Nominal     | Provisioning      | Chi-squared                                   |
| <i>Reg</i>                                                  | perceived as important by respondent                                           |             | Regulating        |                                               |
| <i>Cult</i>                                                 |                                                                                |             | Cultural          |                                               |
| <b>Particular ecosystem service identified as important</b> |                                                                                |             |                   |                                               |
|                                                             | If respondent recognized ecosystems' capacity to provide...                    |             |                   |                                               |
| <i>Agric</i>                                                | food from agriculture                                                          | Dummy       | 1: yes; 0: no     | RDA*                                          |
| <i>Cattle</i>                                               | food from cattle                                                               | Dummy       | 1: yes; 0: no     | RDA                                           |
| <i>Fishing</i>                                              | food through fishing and shellfishing activities                               | Dummy       | 1: yes; 0: no     | RDA                                           |
| <i>Forest prod.</i>                                         | forest resources                                                               | Dummy       | 1: yes; 0: no     | RDA                                           |
| <i>Micro-clima</i>                                          | micro-climate regulation                                                       | Dummy       | 1: yes; 0: no     | RDA                                           |
| <i>Air purif.</i>                                           | air purification                                                               | Dummy       | 1: yes; 0: no     | RDA                                           |
| <i>Water reg.</i>                                           | hydrological regulation and water depuration                                   | Dummy       | 1: yes; 0: no     | RDA                                           |
| <i>Soil form.</i>                                           | soil fertility and erosion control                                             | Dummy       | 1: yes; 0: no     | RDA                                           |
| <i>Tourism</i>                                              | nature tourism and ecotourism                                                  | Dummy       | 1: yes; 0: no     | RDA                                           |
| <i>Aesthetic</i>                                            | aesthetic values from landscape enjoy                                          | Dummy       | 1: yes; 0: no     | RDA                                           |
| <i>Env. Educ.</i>                                           | possibility of environmental education                                         | Dummy       | 1: yes; 0: no     | RDA                                           |
| <i>LEK</i>                                                  | local ecological knowledge and sense of place                                  | Dummy       | 1: yes; 0: no     | RDA                                           |
| <i>Rec. hunting</i>                                         | recreational hunting                                                           | Dummy       | 1: yes; 0: no     | RDA                                           |
| <i>Existence value</i>                                      | Moral satisfaction obtained from protecting biodiversity <sup>†</sup>          | Dummy       | 1: yes; 0: no     | RDA                                           |
| <b>Independent variables</b>                                |                                                                                |             |                   |                                               |
| <b>Management strategy</b>                                  |                                                                                |             |                   |                                               |
|                                                             | If the sampling point is...                                                    |             |                   |                                               |
| <i>National Park</i>                                        | inside borders of National Park (representing the highest level of protection) | Nominal     |                   | Kruskal-Wallis                                |
| <i>Natural Park</i>                                         | inside borders of Natural Park (with medium level of protection)               |             |                   | RDA                                           |
| <i>Non-protected</i>                                        | outside PA <sup>‡</sup> (without protection)                                   |             |                   |                                               |

\* RDA = Redundancy analysis

<sup>†</sup> Adapted from [1]

<sup>‡</sup> PA = Protected Area

|                                                 |                                                                                                                                                                             |            |                                                  |                              |
|-------------------------------------------------|-----------------------------------------------------------------------------------------------------------------------------------------------------------------------------|------------|--------------------------------------------------|------------------------------|
| <b><i>Environmental behaviour</i></b>           |                                                                                                                                                                             |            |                                                  |                              |
| PAs                                             | If respondent visited PAs during the previous year                                                                                                                          | Dummy      | 1: yes; 0: no                                    | Logit<br>Mann-Whitney<br>RDA |
| Organization                                    | If respondent held membership of environmental or social organization                                                                                                       | Dummy      | 1: yes; 0: no                                    | Logit<br>Mann-Whitney<br>RDA |
| <b><i>Socio-demographic characteristics</i></b> |                                                                                                                                                                             |            |                                                  |                              |
| <i>Place of residence</i>                       | If respondents lived in a rural or urban municipality according to the definition of the Spanish Law for the Sustainable Development of the Rural Environment (Law 45/2007) | Nominal    | Rural<br>Urban                                   | Mann-Whitney<br>RDA          |
| <i>Education</i>                                | Respondents' formal studies level                                                                                                                                           | Ordinal    | 0: none; 1: primary; 2: secondary; 3: university | Logit<br>Kruskal-Wallis      |
| <i>Age</i>                                      | Younger people (age < 30)                                                                                                                                                   | Continuous | Ln (study level)                                 | RDA                          |
|                                                 | Older people (age > 70)                                                                                                                                                     | Dummy      | 1: yes; 0: no                                    | Mann-Whitney                 |
|                                                 | Respondent's age                                                                                                                                                            | Dummy      | 1: yes; 0: no                                    | Mann-Whitney                 |
| <i>Gender</i>                                   |                                                                                                                                                                             | Continuous | Ln (Age)                                         | RDA                          |
|                                                 |                                                                                                                                                                             | Nominal    | Male<br>Female                                   | Logit<br>Mann-Whitney<br>RDA |
| <i>Income</i>                                   | Monthly income of respondent                                                                                                                                                | Continuous | Ln (monthly income)                              | RDA                          |
| <b><i>Ecosystems<sup>§</sup></i></b>            |                                                                                                                                                                             |            |                                                  |                              |
| <i>Rivers and streams</i>                       | If the sampling point is in or close to... Rivers and streams                                                                                                               | Dummy      | 1: yes; 0: no                                    | Chi-squared<br>RDA           |
| <i>Wetlands</i>                                 | Wetlands                                                                                                                                                                    | Dummy      | 1: yes; 0: no                                    | Chi-squared<br>RDA           |
| <i>Coastal</i>                                  | Coastal systems                                                                                                                                                             | Dummy      | 1: yes; 0: no                                    | Chi-squared<br>RDA           |
| <i>Mountains</i>                                | Mountains (altitude $\geq$ 2000 m.a.s.l.)                                                                                                                                   | Dummy      | 1: yes; 0: no                                    | Chi-squared<br>RDA           |
| <i>Forests</i>                                  | Forests                                                                                                                                                                     | Dummy      | 1: yes; 0: no                                    | Chi-squared<br>RDA           |
| <i>Drylands</i>                                 | Drylands                                                                                                                                                                    | Dummy      | 1: yes; 0: no                                    | Chi-squared<br>RDA           |
| <i>Agroecosystems</i>                           | Agroecosystems                                                                                                                                                              | Dummy      | 1: yes; 0: no                                    | Chi-squared<br>RDA           |
| <i>Urban</i>                                    | Urban systems                                                                                                                                                               | Dummy      | 1: yes; 0: no                                    | Chi-squared<br>RDA           |

<sup>§</sup> Based on Millennium Ecosystem Assessment classification [2]

## References

1. Kahneman D, Knetsch JL (1992) Valuing public goods: The purchase of moral satisfaction. *Journal of Environmental Economics and Management* 22: 57–70.
2. Millennium Ecosystem Assessment (MA) (2005) *Ecosystems and Human Well-being: Synthesis*. Washington, DC.: Island Press. 137 p.
